# Supplementary material
Source: publisher figshare collection journal article supplement (https://acs.figshare.com/ndownloader/files/4562674)

## Supporting information for

# $(\eta^3\text{-Allyl})\text{Ni(II)}$ , $\text{Pd(II)}$ , and $\text{Pt(II)}$ Complexes Bearing a Bidentate Titanium(IV) Phosphinoamide Ligand: a $\text{Ti} \leftarrow \text{M}$ Dative Bond Enhances the Electrophilicity of the $\pi\text{-Allyl}$ Moiety

Hironori Tsutsumi,<sup>‡</sup> Yusuke Sunada,<sup>†</sup> Yoshihito Shiota,<sup>†</sup> Kazunari Yoshizawa,<sup>†</sup>

and Hideo Nagashima<sup>†,‡,\*</sup>

<sup>†</sup>Institute for Materials Chemistry and Engineering, and <sup>‡</sup>Graduate School of Engineering Sciences,

\* Corresponding author. E-Mail: nagasima@cm.kyushu-u.ac.jp

<sup>†</sup> Institute for Materials Chemistry and Engineering, Kyushu University.

<sup>‡</sup> Graduate School of Engineering Sciences, Kyushu University.

## Contents

### Experimental Procedure

**Figure S1.**  $^1\text{H}$ ,  $^{13}\text{C}$ ,  $^{19}\text{F}$ , and  $^{31}\text{P}$  NMR spectra of  $[(\eta^3\text{-methallyl})\text{Ni}(\text{Ph}_2\text{PN}^t\text{Bu})_2\text{TiCl}_2](\text{OTf})$  (**2a**)

**Figure S2.**  $^1\text{H}$ ,  $^{13}\text{C}$ ,  $^{19}\text{F}$ , and  $^{31}\text{P}$  NMR spectra of  $[(\eta^3\text{-methallyl})\text{Pd}(\text{Ph}_2\text{PN}^t\text{Bu})_2\text{TiCl}_2](\text{OTf})$  (**2b**)

**Figure S3.**  $^1\text{H}$  and  $^{31}\text{P}$  NMR spectra of  $[(\eta^3\text{-methallyl})\text{Pt}(\text{Ph}_2\text{PN}^t\text{Bu})_2\text{TiCl}_2](\text{OTf})$  (**2c**)

**Figure S4.** VT-  $^1\text{H}$  and  $^{31}\text{P}$  NMR spectra of  $[(\eta^3\text{-methallyl})\text{Ni}(\text{Ph}_2\text{PN}^t\text{Bu})_2\text{TiCl}_2](\text{OTf})$  (**2a**)

**Figure S5.** VT-  $^1\text{H}$  and  $^{31}\text{P}$  NMR spectra of  $[(\eta^3\text{-methallyl})\text{Pd}(\text{Ph}_2\text{PN}^t\text{Bu})_2\text{TiCl}_2](\text{OTf})$  (**2b**)

**Figure S6.** ESI-(tof)-MS spectrum of  $[(\eta^3\text{-methallyl})\text{Ni}(\text{Ph}_2\text{PN}^t\text{Bu})_2\text{TiCl}_2](\text{OTf})$  (**2a**)

**Figure S7.** ESI-(tof)-MS spectrum of  $[(\eta^3\text{-methallyl})\text{Pd}(\text{Ph}_2\text{PN}^t\text{Bu})_2\text{TiCl}_2](\text{OTf})$  (**2b**)

**Figure S8.** ESI-(tof)-MS spectrum of  $[(\eta^3\text{-methallyl})\text{Pt}(\text{Ph}_2\text{PN}^t\text{Bu})_2\text{TiCl}_2](\text{OTf})$  (**2c**)

**Table S1.** Crystallographic data for **2a**, **2b**, and **2c**.

**Table S2.** Representative bond lengths and angles for **2a**, **2b**, and **2c**.

**Figure S9.** ORTEP representation of the molecular structure of  $[(\eta^3\text{-methallyl})\text{Ni}(\text{Ph}_2\text{PN}^t\text{Bu})_2\text{TiCl}_2](\text{OTf})$  (**2a**)

**Figure S10.** Gaussview depiction of HOMO for the calculated complex  $[(\eta^3\text{-methallyl})\text{Ni}(\text{Ph}_2\text{PN}^t\text{Bu})_2\text{TiCl}_2](\text{OTf})$  (**2a**)

**Figure S11.** ORTEP representation of the molecular structure of  $[(\eta^3\text{-methallyl})\text{Pd}(\text{Ph}_2\text{PN}^t\text{Bu})_2\text{TiCl}_2](\text{OTf})$  (**2b**)

**Figure S12.** Gaussview depiction of HOMO-1 for the calculated complex  $[(\eta^3\text{-methallyl})\text{Pd}(\text{Ph}_2\text{PN}^t\text{Bu})_2\text{TiCl}_2](\text{OTf})$  (**2b**)

**Figure S13.** ORTEP representation of the molecular structure of  $[(\eta^3\text{-methallyl})\text{Pt}(\text{Ph}_2\text{PN}^t\text{Bu})_2\text{TiCl}_2](\text{OTf})$  (**2c**)

**Figure S14.** Gaussview depiction of HOMO for the calculated complex  $[(\eta^3\text{-methallyl})\text{Pt}(\text{Ph}_2\text{PN}^t\text{Bu})_2\text{TiCl}_2](\text{OTf})$  (**2c**)

## Experimental Procedure

**General.** Manipulation of air and moisture sensitive organometallic compounds was carried out under a dry argon atmosphere using standard Schlenk tube techniques associated with a high-vacuum line. All solvents were distilled over appropriate drying reagents prior to use (THF, hexane;  $\text{Ph}_2\text{CO}/\text{Na}$ ,  $\text{CH}_2\text{Cl}_2$ ;  $\text{CaH}_2$ , acetone; MS 4A).  $^1\text{H}$ ,  $^{13}\text{C}$ ,  $^{19}\text{F}$ ,  $^{31}\text{P}$  NMR spectra was recorded on a JEOL Lambda 600 or a Lambda 400 spectrometer at ambient temperature unless otherwise noted.  $^1\text{H}$ ,  $^{13}\text{C}$ , and  $^{31}\text{P}$  NMR chemical shifts ( $\delta$  values) were given in ppm relative to the solvent signal ( $^1\text{H}$ ,  $^{13}\text{C}$ ) or standard resonances ( $^{19}\text{F}$ ; external  $\text{CF}_3\text{COOH}$ ,  $^{31}\text{P}$ ; external 85%  $\text{H}_3\text{PO}_4$ ). ESI mass spectra were recorded on a JEOL JMS-T100CS apparatus. Melting points were measured on a Yanaco SMP3 micro melting point apparatus. Elemental analyses were performed by a Perkin Elmer 2400II/CHN analyzer. Starting materials, titanium phosphinoamide <sup>1</sup>),  $[(\eta^3\text{-methallyl})\text{NiCl}]_2$  <sup>2</sup>),  $[(\eta^3\text{-methallyl})\text{PdCl}]_2$  <sup>3</sup>),  $[(\eta^3\text{-methallyl})\text{PtCl}]_2$  <sup>4</sup>) were synthesized by the method reported in the literature.

**Preparation of  $[(\eta^3\text{-methallyl})\text{Ni}(\text{Ph}_2\text{PN}^t\text{Bu})_2\text{TiCl}_2](\text{OTf})$  (**2a**).** In a glove box,  $[(\eta^3\text{-methallyl})\text{NiCl}]_2$  (70.3 mg, 0.24 mmol) and acetone (350  $\mu\text{L}$ , 4.8 mmol) was mixed in  $\text{CH}_2\text{Cl}_2$  (5 mL), and  $\text{AgOTf}$  (122 mg, 0.48 mmol) was added to this solution. The mixture was stirred at room temperature for 10 min, then  $\text{CH}_2\text{Cl}_2$  solution (5 mL) of titanium phosphinoamide  $(\text{Ph}_2\text{PN}^t\text{Bu})_2\text{TiCl}_2$  (**1**) (300 mg, 0.48 mmol) was added dropwise to this solution. The resulting mixture was stirred at room temperature for 30 min during which time the color of the solution changed from orange to dark red. The solvent was evaporated and the residue extracted with  $\text{CH}_2\text{Cl}_2$ . The insoluble materials were filtered off through a pad of Celite, and the resulting filtrate was collected. Removal of volatiles followed by washing with hexane gave desired heterobimetallic complex (**2a**) as a red powder (242 mg, 57 %). Single crystals of **2a** were grown from  $\text{CH}_2\text{Cl}_2$ /pentane. M.p.: 112  $^\circ\text{C}$ .  $^1\text{H}$  NMR ( $\text{CD}_2\text{Cl}_2$ , r.t.)  $\delta$  1.41 (s, 3H,  $(\text{CH}_2)_2\text{C}(\text{CH}_3)$ ), 1.45 (s, 18H,  $^t\text{Bu}$ ), 3.66 (br s, 4H,  $(\text{CH}_2)_2\text{C}(\text{CH}_3)$ ), 7.23 – 7.25 (m, 4H, Ph), 7.26 – 7.30 (m, 4H, Ph), 7.47 – 7.49 (m, 2H, Ph), 7.53 – 7.57 (m, 4H, Ph), 7.60 – 7.62 (m, 2H, Ph), 7.92 – 7.94 (m, 4H, Ph).  $^1\text{H}$  NMR ( $\text{CD}_2\text{Cl}_2$ , -90  $^\circ\text{C}$ )  $\delta$  1.25 (s, 3H,  $(\text{CH}_2)_2\text{C}(\text{CH}_3)$ ), 1.31 (s, 18H,  $^t\text{Bu}$ ), 3.74 (br s, 2H,  $(\text{CH}_2)_2\text{C}(\text{CH}_3)$ ), 3.86 (br s, 2H,  $(\text{CH}_2)_2\text{C}(\text{CH}_3)$ ), 7.12 – 7.14 (m, 4H, Ph), 7.19 – 7.23 (m, 4H, Ph), 7.38 –

7.41 (m, 2H, Ph), 7.55 – 7.59 (m, 4H, Ph), 7.60 – 7.62 (m, 2H, Ph), 8.31 – 8.37 (m, 4H, Ph).  $^{13}\text{C}$  NMR ( $\text{CD}_2\text{Cl}_2$ )  $\delta$  27.9 ( $\text{CH}_3$ -methallyl), 32.3 (s,  $\text{CMe}_3$ ), 71.5 (br s,  $\text{CMe}_3$ ), 81.60 (br s,  $\text{CH}_2=\text{C}(\text{Me})$ ), 128.7, 129.9, 130.0, 132.4, 132.9, 133.0, 133.9, 134.5 (Ph), 139.2 (br s,  $\text{CH}_2=\text{C}(\text{Me})$ ).  $^{19}\text{F}$   $\{^1\text{H}\}$  NMR ( $\text{CD}_2\text{Cl}_2$ , r.t.)  $\delta$  -82.0 (s).  $^{31}\text{P}$   $\{^1\text{H}\}$  NMR ( $\text{CD}_2\text{Cl}_2$ , r.t.)  $\delta$  14.1 (br s).  $^{31}\text{P}$   $\{^1\text{H}\}$  NMR ( $\text{CD}_2\text{Cl}_2$ , -90 °C)  $\delta$  13.2 (br s). Anal. Calcd. for  $\text{C}_{37}\text{H}_{45}\text{Cl}_2\text{N}_2\text{P}_2\text{O}_3\text{F}_3\text{STiNi}$ : C, 49.70; H, 5.07; N, 3.13. Found: C, 49.52; H, 4.87; N, 2.98 %. Exact mass (ESI-TOF): Calcd. for  $^{12}\text{C}_{36}^{1}\text{H}_{45}^{14}\text{N}_2^{31}\text{P}_2^{35}\text{Cl}_2^{48}\text{Ti}^{58}\text{Ni}_1$ : 743.12680. Found: 743.12751.

**Preparation of  $[(\eta^3\text{-methallyl})\text{Pd}(\text{Ph}_2\text{PN}^t\text{Bu})_2\text{TiCl}_2](\text{OTf})$  (**2b**).** In a glove box,  $[(\eta^3\text{-methallyl})\text{PdCl}]_2$  (40.3 mg, 0.1 mmol) and acetone (151  $\mu\text{L}$ , 2.0 mmol) was mixed in  $\text{CH}_2\text{Cl}_2$  (5 mL), and AgOTf (52.7 mg, 0.2 mmol) was added to this solution. The mixture was stirred at room temperature for 10 min, then  $\text{CH}_2\text{Cl}_2$  solution (5 mL) of titanium phosphinoamide  $(\text{Ph}_2\text{PN}^t\text{Bu})_2\text{TiCl}_2$  (**1**) (130 mg, 0.2 mmol) was added dropwise to this solution. The resulting mixture was stirred at room temperature for 30 min during which time the color of the solution changed from orange to red. The solvent was evaporated and the residue extracted with  $\text{CH}_2\text{Cl}_2$ . The insoluble materials were filtered off through a pad of Celite, and the resulting filtrate was collected. Removal of volatiles followed by washing with hexane gave desired heterobimetallic complex (**2b**) as a red powder (140 mg, 73 %). Single crystals of **2b** were grown from  $\text{CH}_2\text{Cl}_2$ /pentane. M.p.: 131 °C.  $^1\text{H}$  NMR ( $\text{CD}_2\text{Cl}_2$ , r.t.)  $\delta$  1.50 (s, 18H,  $^t\text{Bu}$ ), 1.52 (s, 3H,  $(\text{CH}_2)_2\text{C}(\text{CH}_3)$ ), 3.76 (br s, 4H,  $(\text{CH}_2)_2\text{C}(\text{CH}_3)$ ), 7.13 – 7.16 (m, 4H, Ph), 7.21 – 7.24 (m, 4H, Ph), 7.38 – 7.41 (m, 2H, Ph), 7.55 – 7.59 (m, 4H, Ph), 7.58 – 7.62 (m, 2H, Ph), 7.89 – 7.93 (m, 4H, Ph).  $^1\text{H}$  NMR ( $\text{CD}_2\text{Cl}_2$ , -90 °C)  $\delta$  1.40 (s, 18H,  $^t\text{Bu}$ ), 1.42 (s, 3H,  $(\text{CH}_2)_2\text{C}(\text{CH}_3)$ ), 3.70 (br s, 4H,  $(\text{CH}_2)_2\text{C}(\text{CH}_3)$ ), 7.03 – 7.06 (m, 4H, Ph), 7.13 – 7.17 (m, 4H, Ph), 7.32 – 7.34 (m, 2H, Ph), 7.45 – 7.50 (m, 4H, Ph), 7.53 – 7.56 (m, 2H, Ph), 8.27 – 8.31 (m, 4H, Ph).  $^{13}\text{C}$  NMR ( $\text{CD}_2\text{Cl}_2$ )  $\delta$  27.5 ( $\text{CH}_3$ -methallyl), 33.8 (s,  $\text{CMe}_3$ ), 72.1 (t,  $\text{CMe}_3$ ,  $J_{\text{C-P}} = 5.8$  Hz), 83.0 (t,  $\text{CH}_2=\text{C}(\text{Me})$ ,  $J_{\text{C-P}} = 11.6$  Hz), 128.5, 129.3, 129.6, 129.7, 131.4, 132.0, 132.3, 132.8 (Ph), 141.1 (t,  $\text{CH}_2=\text{C}(\text{Me})$ ,  $J_{\text{C-P}} = 4.3$  Hz).  $^{19}\text{F}$   $\{^1\text{H}\}$  NMR ( $\text{CD}_2\text{Cl}_2$ , r.t.)  $\delta$  -82.1 (s).  $^{31}\text{P}$   $\{^1\text{H}\}$  NMR ( $\text{CD}_2\text{Cl}_2$ , r.t.)  $\delta$  9.75 (s).  $^{31}\text{P}$   $\{^1\text{H}\}$  NMR ( $\text{CD}_2\text{Cl}_2$ , -90 °C)  $\delta$  8.56 (s). Anal. Calcd. for

C<sub>37</sub>H<sub>45</sub>Cl<sub>2</sub>N<sub>2</sub>P<sub>2</sub>O<sub>3</sub>F<sub>3</sub>STiPd: C, 47.18; H, 4.82; N, 2.97. Found: C, 46.82; H, 4.54; N, 2.68 %. Exact mass (ESI-TOF): Calcd. for <sup>12</sup>C<sub>36</sub><sup>1</sup>H<sub>45</sub><sup>14</sup>N<sub>2</sub><sup>31</sup>P<sub>2</sub><sup>35</sup>Cl<sub>2</sub><sup>48</sup>Ti<sub>1</sub><sup>106</sup>Pd<sub>1</sub>: 791.09493. Found: 791.09391.

**Preparation of [(η<sup>3</sup>-methallyl)Pt(Ph<sub>2</sub>PN<sup>t</sup>Bu)<sub>2</sub>TiCl<sub>2</sub>](OTf) (2c).** In a glove box, [(η<sup>3</sup>-methallyl)PtCl]<sub>2</sub> (45 mg, 0.08 mmol) and acetone (116 μL, 1.6 mmol) was mixed in CH<sub>2</sub>Cl<sub>2</sub> (5 mL), and AgOTf (40.7 mg, 0.16 mmol) was added to this solution. The mixture was stirred at room temperature for 10 min, then CH<sub>2</sub>Cl<sub>2</sub> solution (5 mL) of titanium phosphinoamide (Ph<sub>2</sub>PN<sup>t</sup>Bu)<sub>2</sub>TiCl<sub>2</sub> (**1**) (100 mg, 0.16 mmol) was added dropwise to this solution. The resulting mixture was stirred at room temperature for 30 min during which time the color of the solution changed from orange to dark red. The solvent was evaporated and the residue extracted with CH<sub>2</sub>Cl<sub>2</sub>. The insoluble materials were filtered off through a pad of Celite, and the resulting filtrate was collected. Removal of volatiles followed by washing with hexane gave desired heterobimetallic complex (**2c**) as a orange powder (128 mg, 81 %). Single crystals of **2c** were obtained by cooling the saturated toluene solution at - 35 °C. M.p.: 138 °C. <sup>1</sup>H NMR (CD<sub>2</sub>Cl<sub>2</sub>, r.t.) δ 1.51 (s, 18H, <sup>t</sup>Bu), 1.76 (s, 3H, (CH<sub>2</sub>)<sub>2</sub>C(CH<sub>3</sub>)), 3.46 (br s, 2H, (CH<sub>2</sub>)<sub>2</sub>C(CH<sub>3</sub>)), 3.55 (br s, 2H, (CH<sub>2</sub>)<sub>2</sub>C(CH<sub>3</sub>)), 7.12 – 7.15 (m, 4H, Ph), 7.18 – 7.22 (m, 4H, Ph), 7.34 – 7.37 (m, 2H, Ph), 7.44 – 7.46 (m, 4H, Ph), 7.53 – 7.57 (m, 2H, Ph), 7.80 – 7.84 (m, 4H, Ph). <sup>1</sup>H NMR (CD<sub>2</sub>Cl<sub>2</sub>, -90 °C) δ 1.40 (s, 18H, <sup>t</sup>Bu), 1.68 (s, 3H, (CH<sub>2</sub>)<sub>2</sub>C(CH<sub>3</sub>)), 3.70 (br s, 4H, (CH<sub>2</sub>)<sub>2</sub>C(CH<sub>3</sub>)), 7.15 – 7.19 (m, 4H, Ph), 7.26 – 7.30 (m, 4H, Ph), 7.33 – 7.38 (m, 2H, Ph), 7.49 – 7.54 (m, 4H, Ph), 7.60 – 7.62 (m, 2H, Ph), 8.16 – 8.20 (m, 4H, Ph). The measurement of satisfactory <sup>13</sup>C NMR spectrum was unsuccessful due to its poor solubility. <sup>31</sup>P {<sup>1</sup>H} NMR (CD<sub>2</sub>Cl<sub>2</sub>, r.t.) δ 0.60 (s with a satellite signal due to the coupling with <sup>195</sup>Pt, J<sub>Pt-P</sub> = 3262 Hz). <sup>31</sup>P {<sup>1</sup>H} NMR (CD<sub>2</sub>Cl<sub>2</sub>, -90 °C) δ -0.16 (s with a satellite signal due to the coupling with <sup>195</sup>Pt, J<sub>Pt-P</sub> = 3216 Hz). Anal. Calcd. for C<sub>37</sub>H<sub>45</sub>Cl<sub>2</sub>N<sub>2</sub>P<sub>2</sub>O<sub>3</sub>F<sub>3</sub>STiPt: C, 43.12; H, 4.40; N, 2.72. Found: C, 43.48; H, 4.68; N, 3.01 %. Exact mass (ESI-TOF): Calcd. for <sup>12</sup>C<sub>36</sub><sup>1</sup>H<sub>45</sub><sup>14</sup>N<sub>2</sub><sup>31</sup>P<sub>2</sub><sup>35</sup>Cl<sub>2</sub><sup>48</sup>Ti<sub>1</sub><sup>195</sup>Pt<sub>1</sub>: 880.15622. Found: 880.15738.

**Preparation of [(dppp)M<sub>2</sub>(η<sup>3</sup>-methallyl)](OTf) (M = Ni (**3a**), Pd (**3b**), Pt (**3c**)).**

The complexes **3a** – **3c** were prepared according to the method reported in the literature <sup>5)</sup> with slight modification. In a typical example,  $[(\eta^3\text{-methallyl})\text{NiCl}]_2$  (29 mg, 0.10 mmol) and acetone (140  $\mu\text{L}$ , 2.0 mmol) was mixed in  $\text{CH}_2\text{Cl}_2$  (5 mL), and AgOTf (50 mg, 0.20 mmol) was added to this solution. The mixture was stirred at room temperature for 10 min, and then dppp (80 mg, 0.20 mmol) was added to this solution. The resulting mixture was stirred at room temperature for 30 min, then the solvent was evaporated, and the residue extracted with  $\text{CH}_2\text{Cl}_2$ . The insoluble materials were filtered off through a pad of Celite, and the resulting filtrate was collected. Removal of volatiles followed by washing with hexane gave desired complex (**3a**) as white powder (102 mg, 74 %).  $^1\text{H}$  NMR ( $\text{CD}_2\text{Cl}_2$ , r.t.)  $\delta$  1.89 (s, 3H,  $\text{CH}_3$ ), 2.50 – 2.91 (m, 6H,  $\text{CH}_2$ ), 2.72 (br s, 2H,  $\text{CH}_2=\text{C}(\text{CH}_3)$ ), 3.43 (br s, 2H,  $\text{CH}_2=\text{C}(\text{CH}_3)$ ) 7.17 – 7.69 (m, 20H, Ph).  $^{31}\text{P}$   $\{^1\text{H}\}$  NMR ( $\text{CD}_2\text{Cl}_2$ , r.t.)  $\delta$  -6.1 (s).

Using similar procedures, **3b** and **3c** were synthesized. **3b**:  $^1\text{H}$  NMR ( $\text{CD}_2\text{Cl}_2$ , r.t.)  $\delta$  1.88 (s, 3H,  $\text{CH}_3$ ), 1.91 – 2.18 (m, 2H,  $\text{CH}_2$ ), 2.62 – 2.81 (m, 4H,  $\text{CH}_2$ ), 3.12 (t,  $J_{\text{P-H}} = 6.9$  Hz, 2H,  $\text{CH}_2=\text{C}(\text{CH}_3)$ ), 3.82 (br s, 2H,  $\text{CH}_2=\text{C}(\text{CH}_3)$ ) 7.26 – 7.55 (m, 20H, Ph).  $^{13}\text{C}$  NMR ( $\text{CD}_2\text{Cl}_2$ , r.t.)  $\delta$  19.2 (s,  $\text{CH}_3$ ), 24.1 (s,  $-\text{CH}_2-$ ), 24.3 (t,  $J_{\text{P-C}} = 15.9$  Hz, P- $\text{CH}_2$ ), 73.4 (t,  $J_{\text{P-C}} = 15.9$  Hz,  $\text{CH}_2=\text{C}(\text{CH}_3)$ ), 129.5 (t,  $J_{\text{P-C}} = 5.8$  Hz, *meta*-Ph), 131.6 (d,  $J_{\text{P-C}} = 24.5$  Hz, *para*-Ph), 132.0 (t,  $J_{\text{P-C}} = 21.7$  Hz, *ipso*-Ph), 132.7 (dt,  $J_{\text{P-C}} = 5.8$ , 44.8 Hz, *ortho*-Ph), 138.2 (t,  $J_{\text{P-C}} = 5.8$  Hz,  $\text{CH}_2=\text{C}(\text{CH}_3)$ ).  $^{31}\text{P}$   $\{^1\text{H}\}$  NMR ( $\text{CD}_2\text{Cl}_2$ , r.t.)  $\delta$  8.70 (s). **3c**:  $^1\text{H}$  NMR ( $\text{CD}_2\text{Cl}_2$ , r.t.)  $\delta$  1.92 (s with a satellite signal due to the coupling with  $^{195}\text{Pt}$ ,  $J_{\text{Pt-H}} = 59.8$  Hz, 3H,  $\text{CH}_3$ ), 1.98 – 2.27 (m, 2H,  $\text{CH}_2$ ), 2.58 – 2.95 (m, 4H,  $\text{CH}_2$ , and 2H,  $\text{CH}_2=\text{C}(\text{CH}_3)$ ), 3.55 (br s, 2H,  $\text{CH}_2=\text{C}(\text{CH}_3)$ ) 7.24 – 7.58 (m, 20H, Ph).  $^{31}\text{P}$   $\{^1\text{H}\}$  NMR ( $\text{CD}_2\text{Cl}_2$ , r.t.)  $\delta$  0.25 (s with a satellite signal due to the coupling with  $^{195}\text{Pt}$ ,  $J_{\text{Pt-P}} = 3512$  Hz).

**Reaction of Ti-M<sub>2</sub> dinuclear complexes with amines.** A mixture of the Ti-M<sub>2</sub> dinuclear complex [for **2a** (9 mg, 0.01 mmol), for **2b** (9 mg, 0.01 mmol), for **2c** (10 mg, 0.01 mmol)] and  $\text{CD}_2\text{Cl}_2$  (0.3 mL) was transferred into a flame dried NMR tube in a glove box. A solution of amine [for HNet<sub>2</sub> (10  $\mu\text{L}$ , 0.1 mmol), for aniline (9.2  $\mu\text{L}$ , 0.1 mmol)] in  $\text{CD}_2\text{Cl}_2$  (0.2 mL) was added to this solution, and the solution

was quickly frozen, and connected to a vacuum line. The tube was evacuated at -78 °C, sealed by flame, quickly warmed, and shaken several times. The NMR measurement was carried out periodically at 25 °C in CD<sub>2</sub>Cl<sub>2</sub>.

The reaction of dppp complexes (**3a**, **3b**, **3c**) with HNEt<sub>2</sub> or aniline were performed using similar method.

**Catalytic allylation of diethylamine catalyzed by 2b.** Methallyl chloride (9.4 µl, 0.1 mmol) and diethylamine (20 µl, 0.2 mmol) was dissolved in CD<sub>2</sub>Cl<sub>2</sub>, and 10 mol % of **2b** (9 mg, 0.01 mmol) was added to this solution. This reaction mixture was quickly transferred into a flame dried NMR tube in a glove box, and the mixture was quickly frozen. The tube was evacuated at lower temperature, sealed by flame, quickly warmed, and shaken for 5 min. Complete conversion of methallyl chloride was confirmed by the NMR measurement at 25 °C.

The reaction of dppp complexes (**3a**, **3b**, **3c**) with HNEt<sub>2</sub> or aniline were performed using similar method.

**X-ray data collection and reduction.** X-ray crystallography was performed on a Rigaku Saturn CCD area detector with graphite monochromated Mo-K $\alpha$  radiation ( $\lambda = 0.71070\text{\AA}$ ). The data were collected at 123(2) K using  $\omega$  scan in the  $\theta$  range of  $3.0 \leq \theta \leq 27.5$  deg (**2a**),  $3.1 \leq \theta \leq 27.5$  deg (**2b**),  $3.0 \leq \theta \leq 27.5$  deg (**2c**). The data obtained were processed using Crystal-Clear (Rigaku) on a Pentium computer, and were corrected for Lorentz and polarization effects. The structure was solved by direct methods<sup>6</sup> for **2a**, **2b**, and **2c**, and expanded using Fourier techniques.<sup>7</sup> The non-hydrogen atoms were refined anisotropically except for the solvent atoms (toluene for **2a** and **2c**, and CH<sub>2</sub>Cl<sub>2</sub> for **2b**). Hydrogen atoms were refined using the riding model. In complex **2c**, there is a large void in the unit cell, however, it was difficult to find the solvated molecule inside the void due to the low quality of the crystal. The final cycle of full-matrix least-squares refinement on  $F^2$  was based on 8,528 observed reflections and 601 variable parameters for **2a**, 9,835 observed reflections and 530 variable parameters for **2b**, 10,987

observed reflections and 521 variable parameters for **2c**. Neutral atom scattering factors were taken from Cromer and Waber.<sup>8</sup> All calculations were performed using the CrystalStructure<sup>9,10</sup> crystallographic software package. Details of final refinement as well as the bond distances and angles are summarized in the supporting information, and the numbering scheme employed is also shown in the supporting information, which were drawn with ORTEP at 50% probability ellipsoid.

## References

1. Nagashima, H.; Sue, T.; Oda, T.; Kanemitsu, A.; Matsumoto, T.; Motoyama, Y.; Sunada, Y. *Organometallics* **2006**, *25*, 1987
2. (a) Shim, C. B.; Kim, Y. H.; Lee, B. Y.; Dong, Y.; Yun, H. *Organometallics* **2003**, *22*, 4272. (b) Semmelhack, M. F. In *Organic Reactions*, John Wiley, **1972**, *19*, 115
3. Hartley, F. R.; Jones, S. R. *J. Organomet. Chem.*, **1974**, *66*, 465.
4. Mabbott, D. J.; Mann, B. E.; Maitlis, P. M. *J. Chem. Soc. Dalton Trans.*, **1977**, 294.
5. Thoumazet, C.; Grützmacher, H.; Deschamps, B.; Ricard, L.; le Floch, P. *Eur. J. Inorg. Chem.*, **2006**, 3911.
6. (a) SHELX97: Sheldrick, G.M. **1997**. (b) SIR97: Altomare, A.; Burla, M. C.; Camalli, M.; Cascarano, G.; Guagliardi, A.; Moliterni, A.; Polidori, G.; Spagna, R. **1999**.
7. DIRDIF99: Beurskens, P. T.; Admiraal, G.; Beurskens, G.; Bosman, W. P.; de Gelder, R.; Israel, R.; Smits, J. M. M. The DIRDIF-99 program system; *Technical Report of the Crystallography Laboratory*; University of Nijmegen, Nijmegen, The Netherlands, **1999**.
8. Cromer, D. T.; Waber, J. T. *International Tables for X-ray Crystallography*; Kynoch Press: Birmingham, U.K., **1974** Vol. 4.



9. CrystalStructure 3.8.0: Crystal Structure Analysis Package; Package, Rigaku and Rigaku/MSC. 9009 New Trails Dr. The Woodlands TX 77381 USA. **2000-2006**.
10. CRYSTALS Issue 11: Carruthers, J.R.; Rollett, J.S.; Betteridge, P.W.; Kinna, D.; Pearce, L.; Larsen, A.; Gabe, E. *Chemical Crystallography Laboratory*; Oxford, U.K., **1999**.

**Figure S1.**  $^1\text{H}$ ,  $^{13}\text{C}$ ,  $^{19}\text{F}$ , and  $^{31}\text{P}$  NMR spectra of  $[(\eta^3\text{-methallyl})\text{Ni}(\text{Ph}_2\text{PN}^t\text{Bu})_2\text{TiCl}_2](\text{OTf})$  (**2a**)

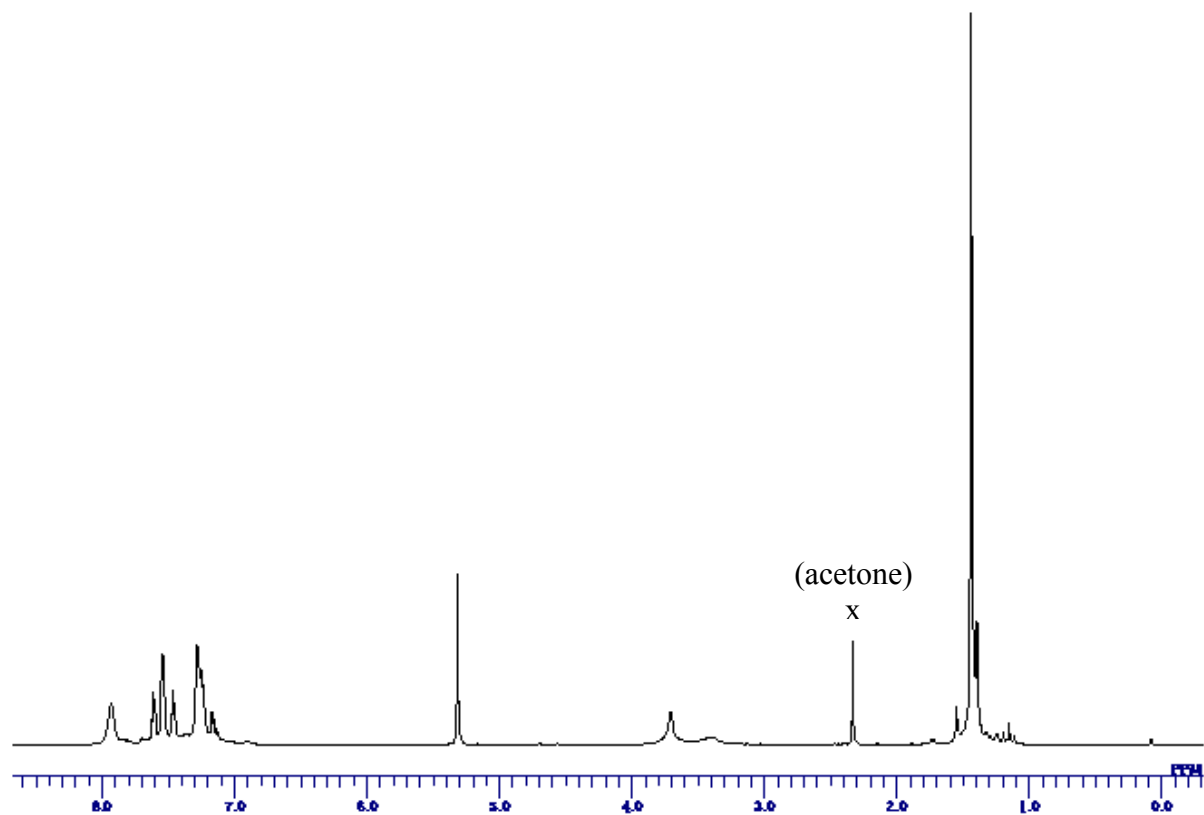

$^1\text{H}$  NMR (600 MHz, in  $\text{CD}_2\text{Cl}_2$ )

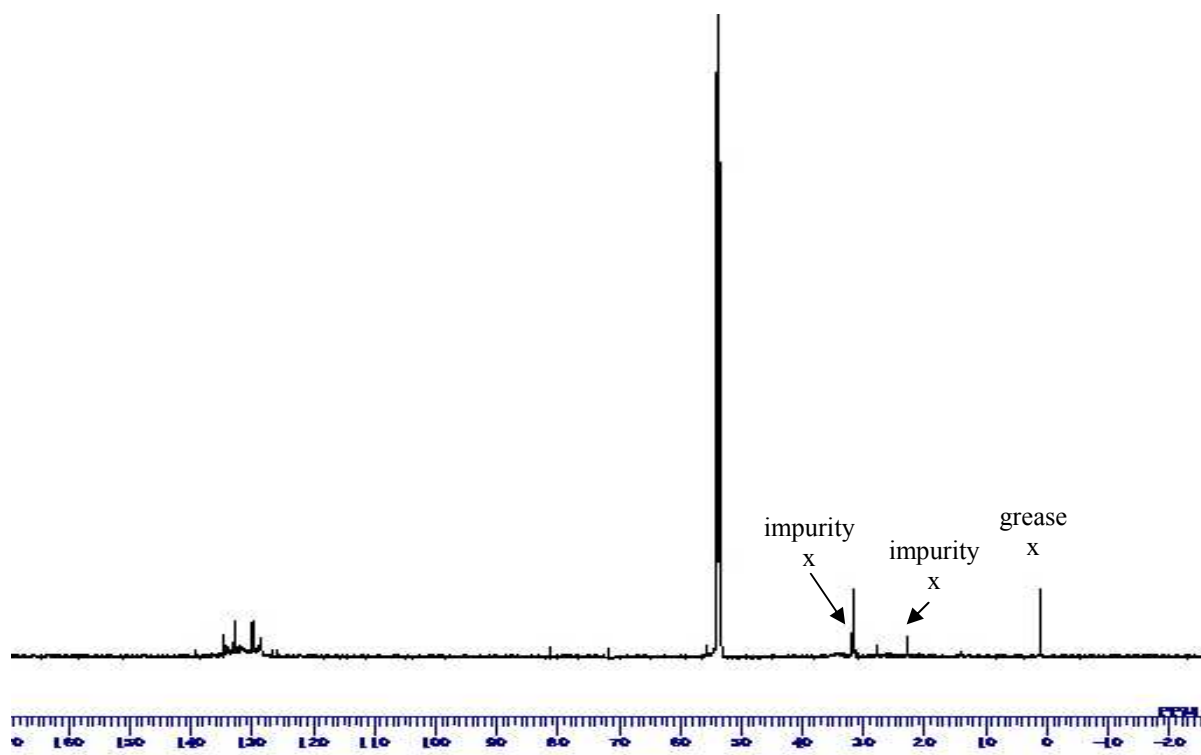

$^{13}\text{C}$  NMR (150 MHz, in  $\text{CD}_2\text{Cl}_2$ )

**Figure S1.**  $^1\text{H}$ ,  $^{13}\text{C}$ ,  $^{19}\text{F}$ , and  $^{31}\text{P}$  NMR spectra of  $[(\eta^3\text{-methallyl})\text{Ni}(\text{Ph}_2\text{PN}^t\text{Bu})_2\text{TiCl}_2](\text{OTf})$  (**2a**) (continued)

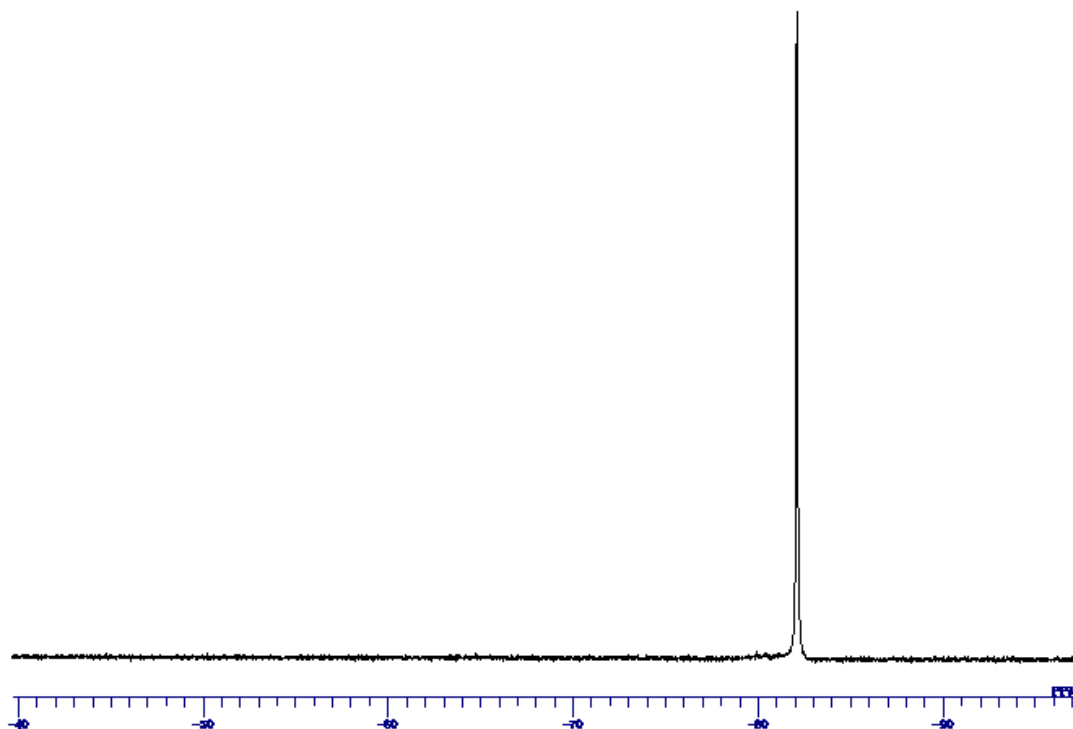

$^{19}\text{F}$  NMR (565 MHz, in  $\text{CD}_2\text{Cl}_2$ )

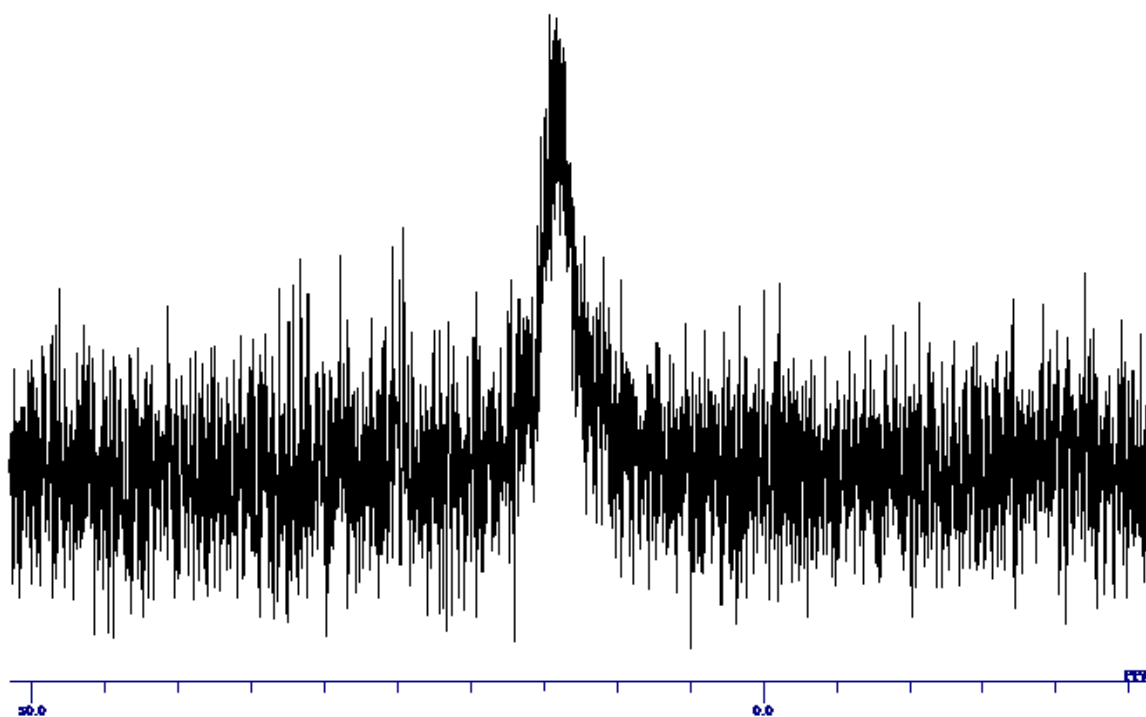

$^{31}\text{P}$  NMR (243 MHz, in  $\text{CD}_2\text{Cl}_2$ )

**Figure S2.**  $^1\text{H}$ ,  $^{13}\text{C}$ ,  $^{19}\text{F}$ , and  $^{31}\text{P}$  NMR spectra of  $[(\eta^3\text{-methallyl})\text{Pd}(\text{Ph}_2\text{PN}^t\text{Bu})_2\text{TiCl}_2](\text{OTf})$  (**2b**)

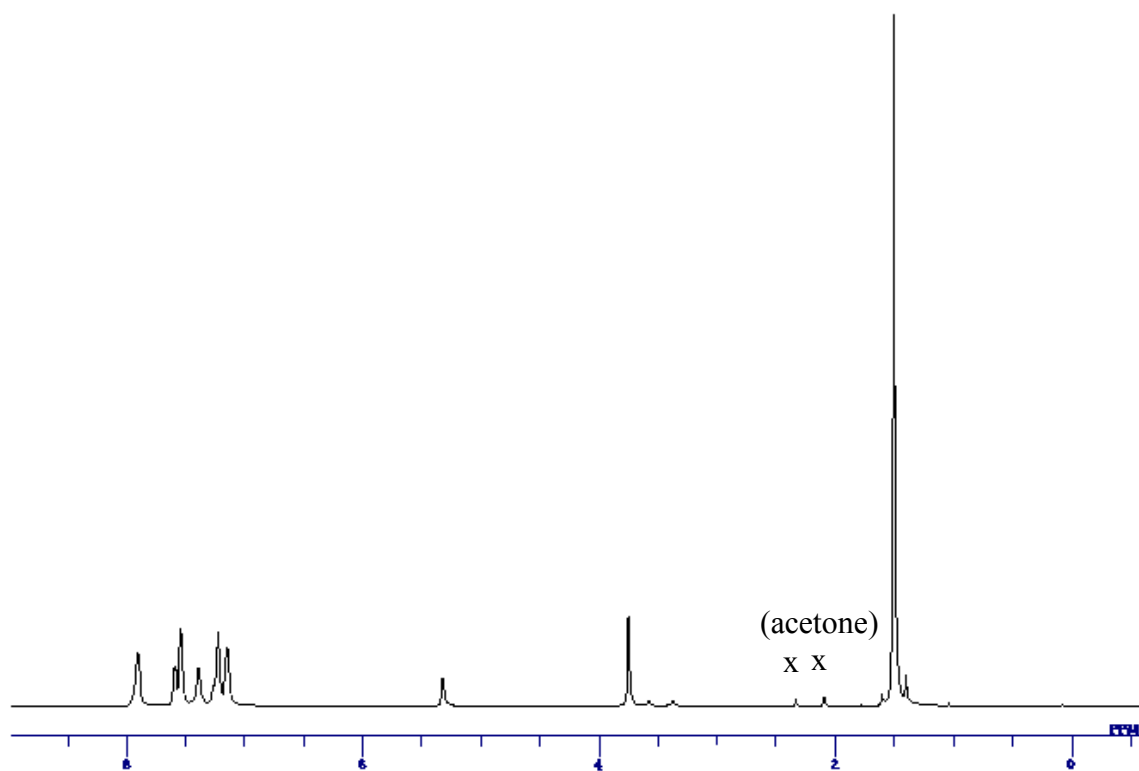

$^1\text{H}$  NMR (600 MHz, in  $\text{CD}_2\text{Cl}_2$ )

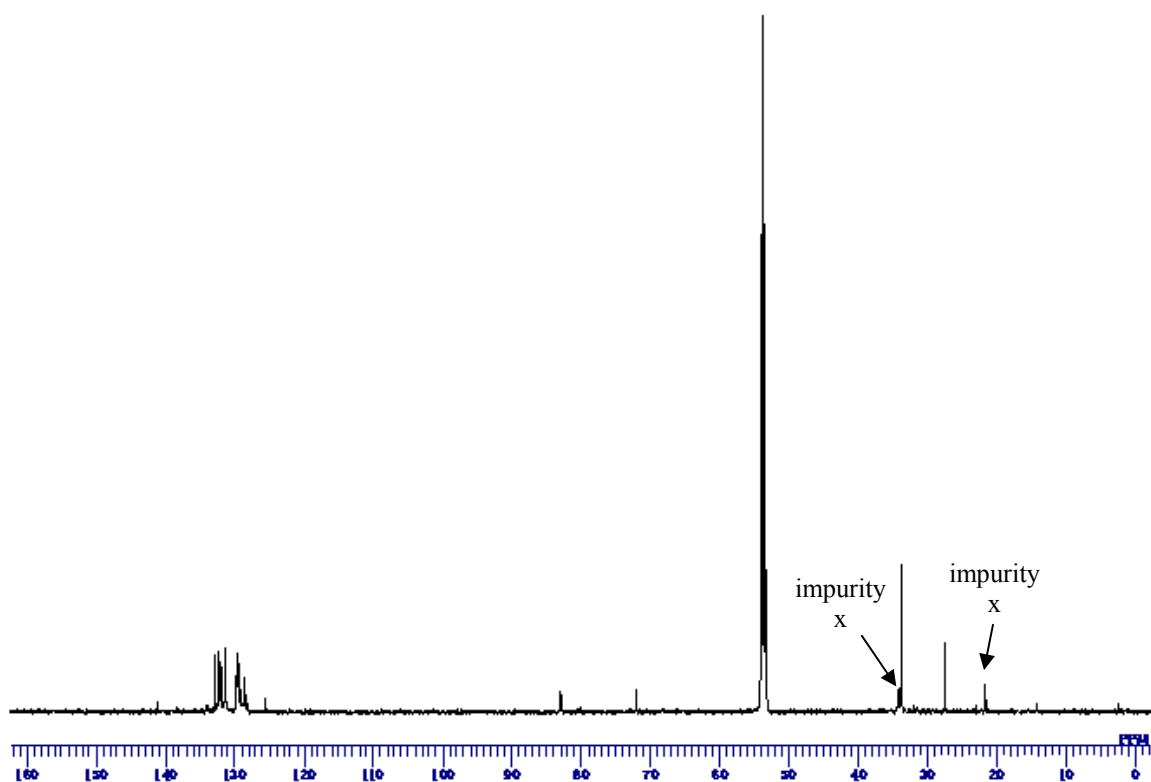

$^{13}\text{C}$  NMR (150 MHz, in  $\text{CD}_2\text{Cl}_2$ )

**Figure S2.**  $^1\text{H}$ ,  $^{13}\text{C}$ ,  $^{19}\text{F}$ , and  $^{31}\text{P}$  NMR spectra of  $[(\eta^3\text{-methallyl})\text{Pd}(\text{Ph}_2\text{PN}^t\text{Bu})_2\text{TiCl}_2](\text{OTf})$  (**2b**) (continued)

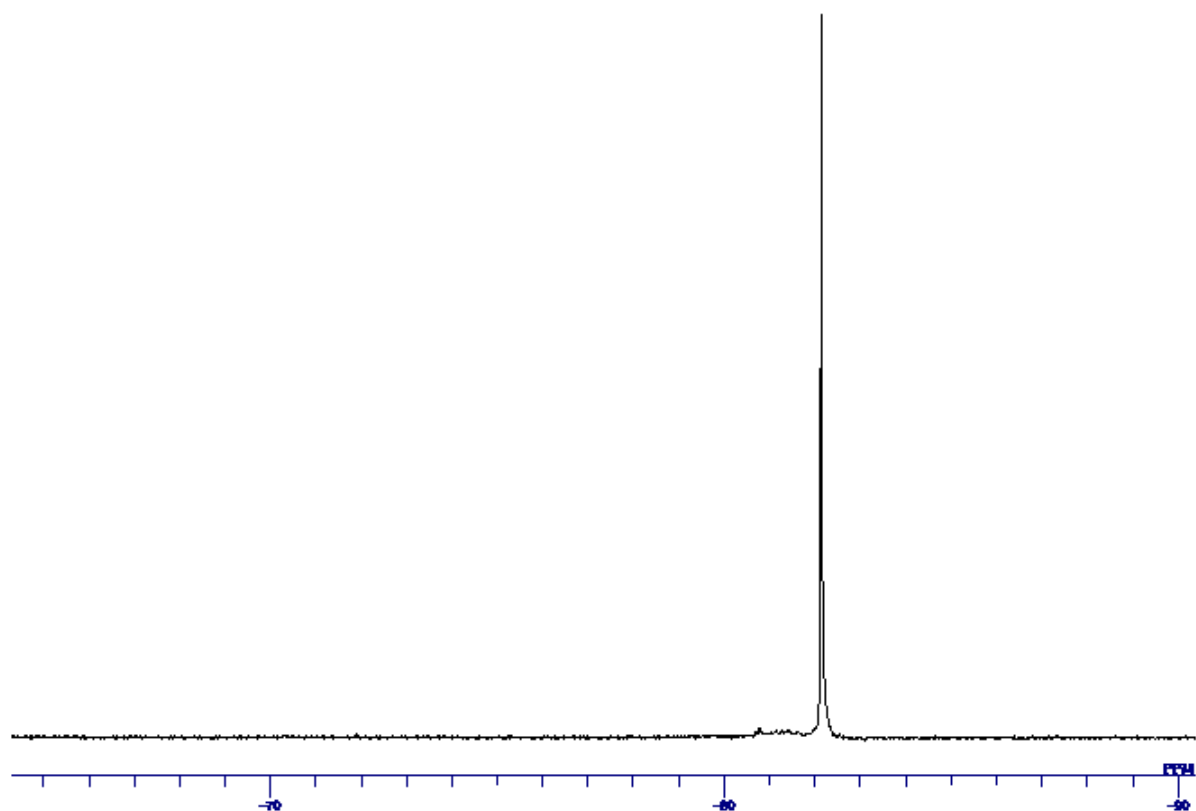

$^{19}\text{F}$  NMR (565 MHz, in  $\text{CD}_2\text{Cl}_2$ )

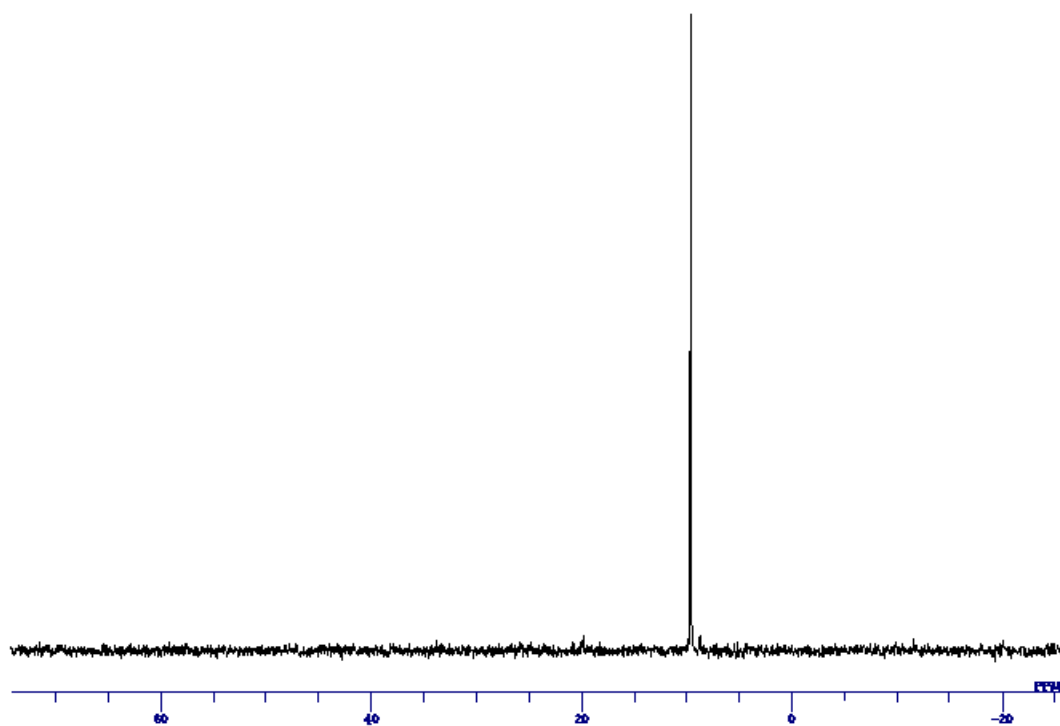

$^{31}\text{P}$  NMR (243 MHz, in  $\text{CD}_2\text{Cl}_2$ )

**Figure S3.**  $^1\text{H}$ ,  $^{13}\text{C}$ ,  $^{19}\text{F}$ , and  $^{31}\text{P}$  NMR spectra of  $[(\eta^3\text{-methallyl})\text{Pt}(\text{Ph}_2\text{PN}^t\text{Bu})_2\text{TiCl}_2](\text{OTf})$  (**2c**)

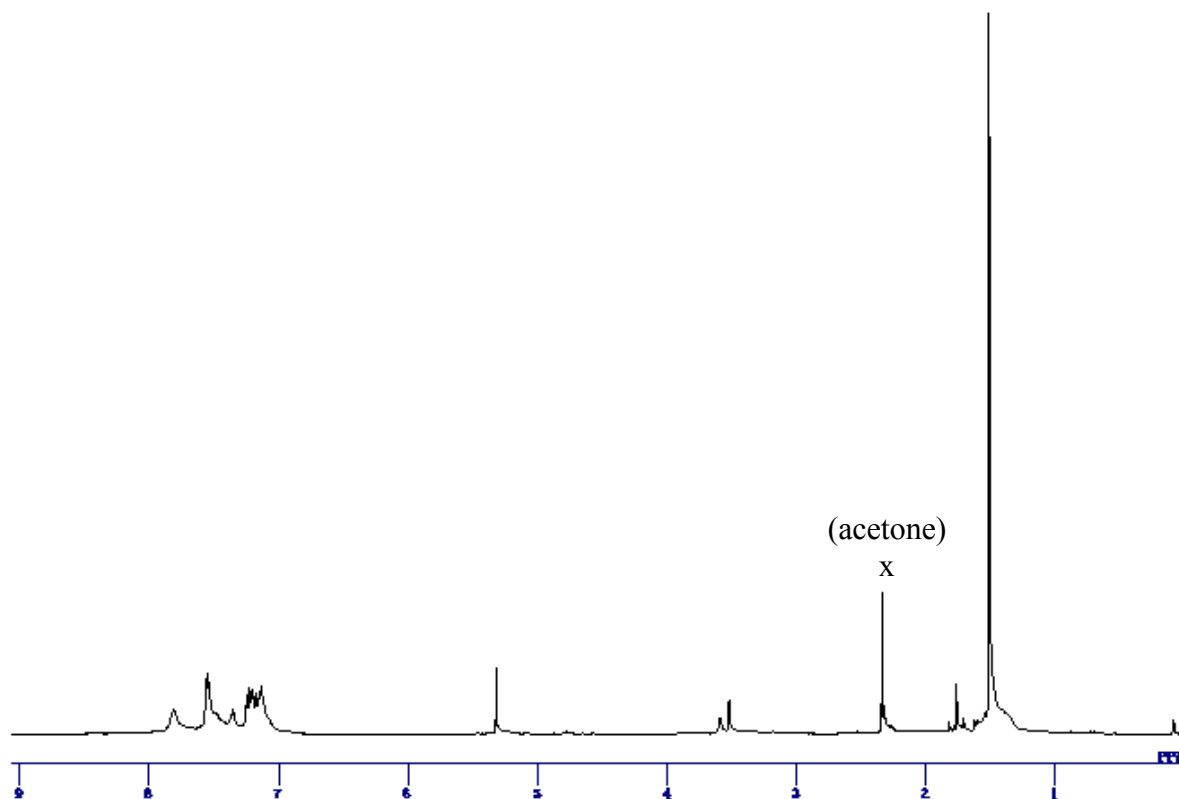

$^1\text{H}$  NMR (600 MHz, in  $\text{CD}_2\text{Cl}_2$ )

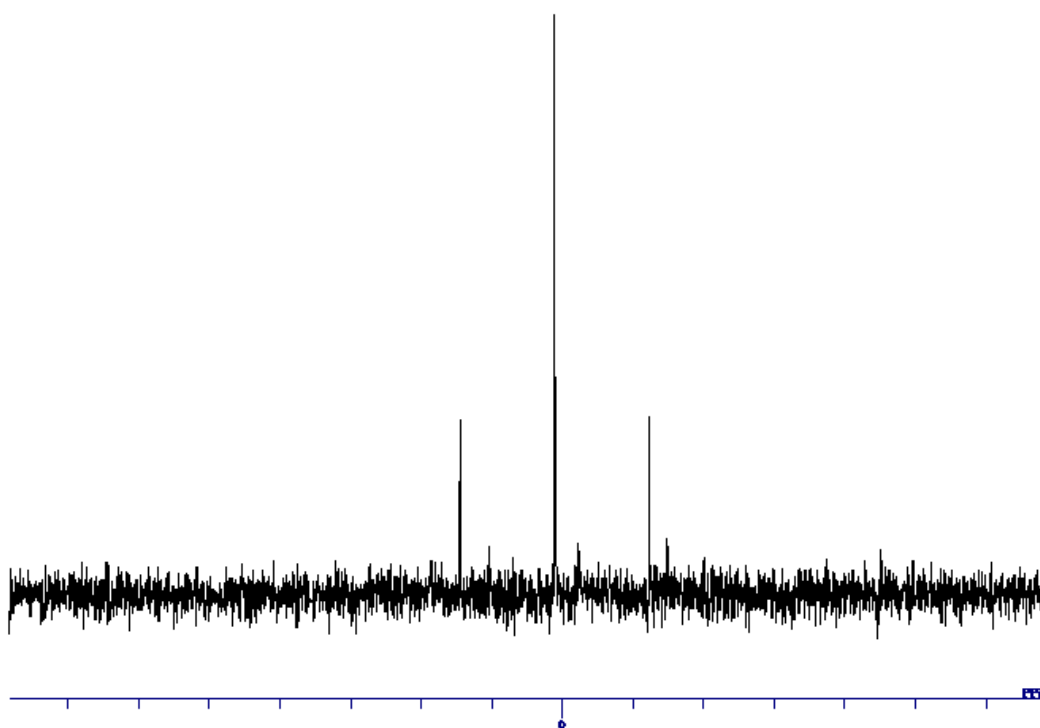

$^{31}\text{P}$  NMR (243 MHz, in  $\text{CD}_2\text{Cl}_2$ )

**Figure S4.** VT-  $^1\text{H}$  and  $^{31}\text{P}$  NMR spectra of  $[(\eta^3\text{-methallyl})\text{Ni}(\text{Ph}_2\text{PN}^t\text{Bu})_2\text{TiCl}_2](\text{OTf})$  (**2a**)

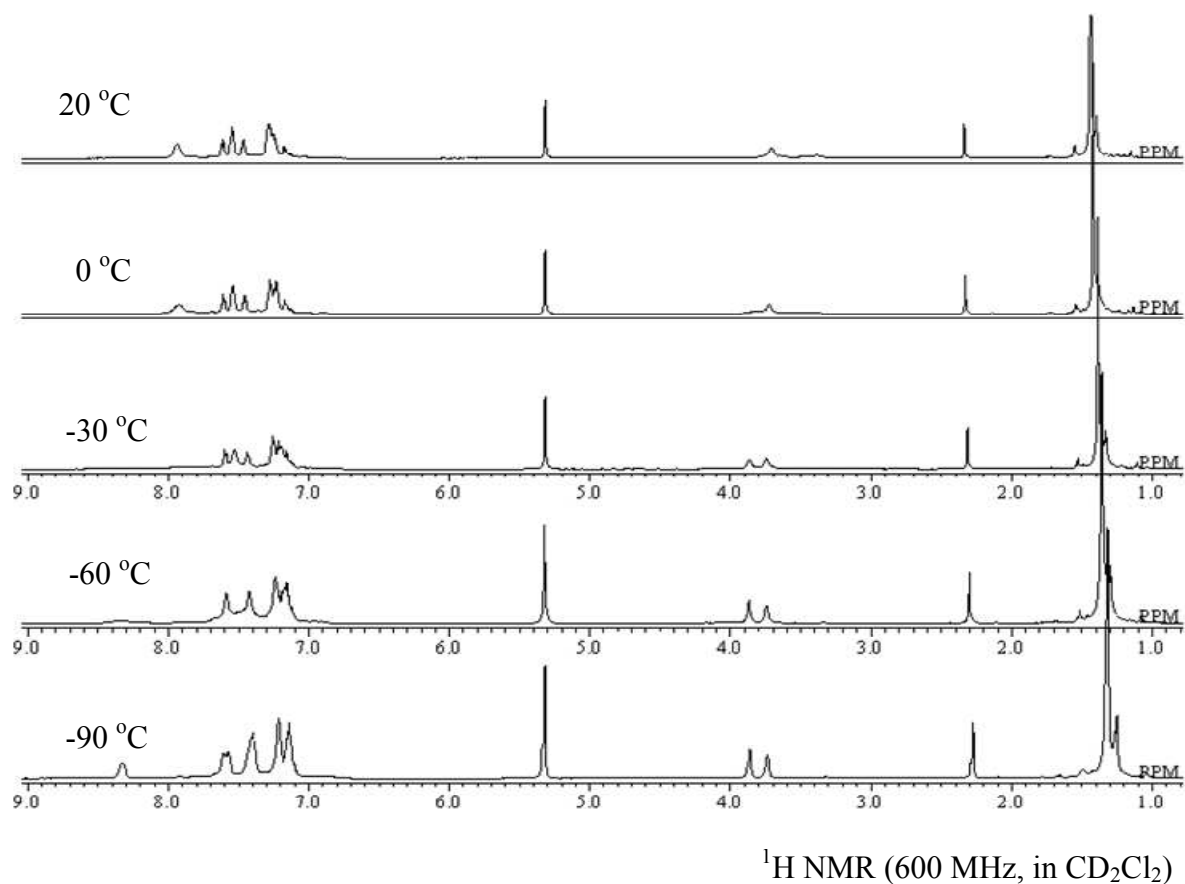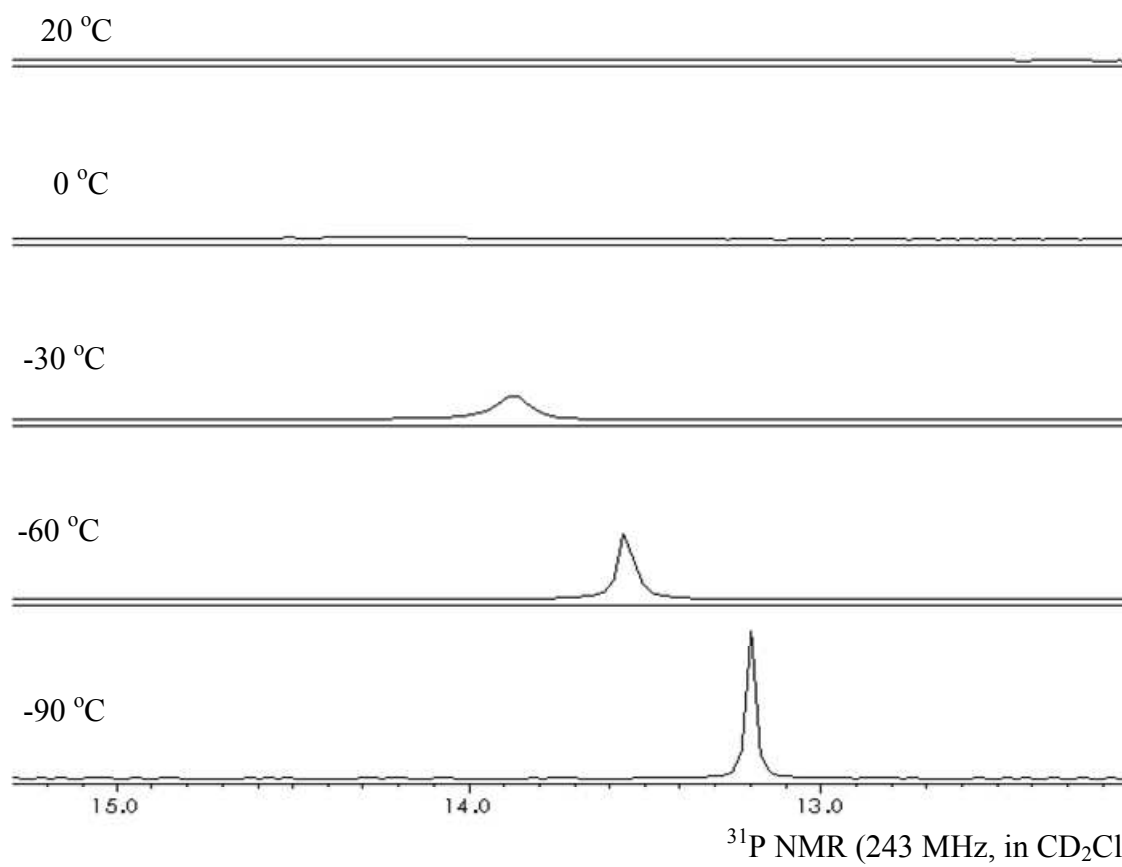

**Figure S5.** VT-  $^1\text{H}$  and  $^{31}\text{P}$  NMR spectra of  $[(\eta^3\text{-methallyl})\text{Pd}(\text{Ph}_2\text{PN}^t\text{Bu})_2\text{TiCl}_2](\text{OTf})$  (**2b**)

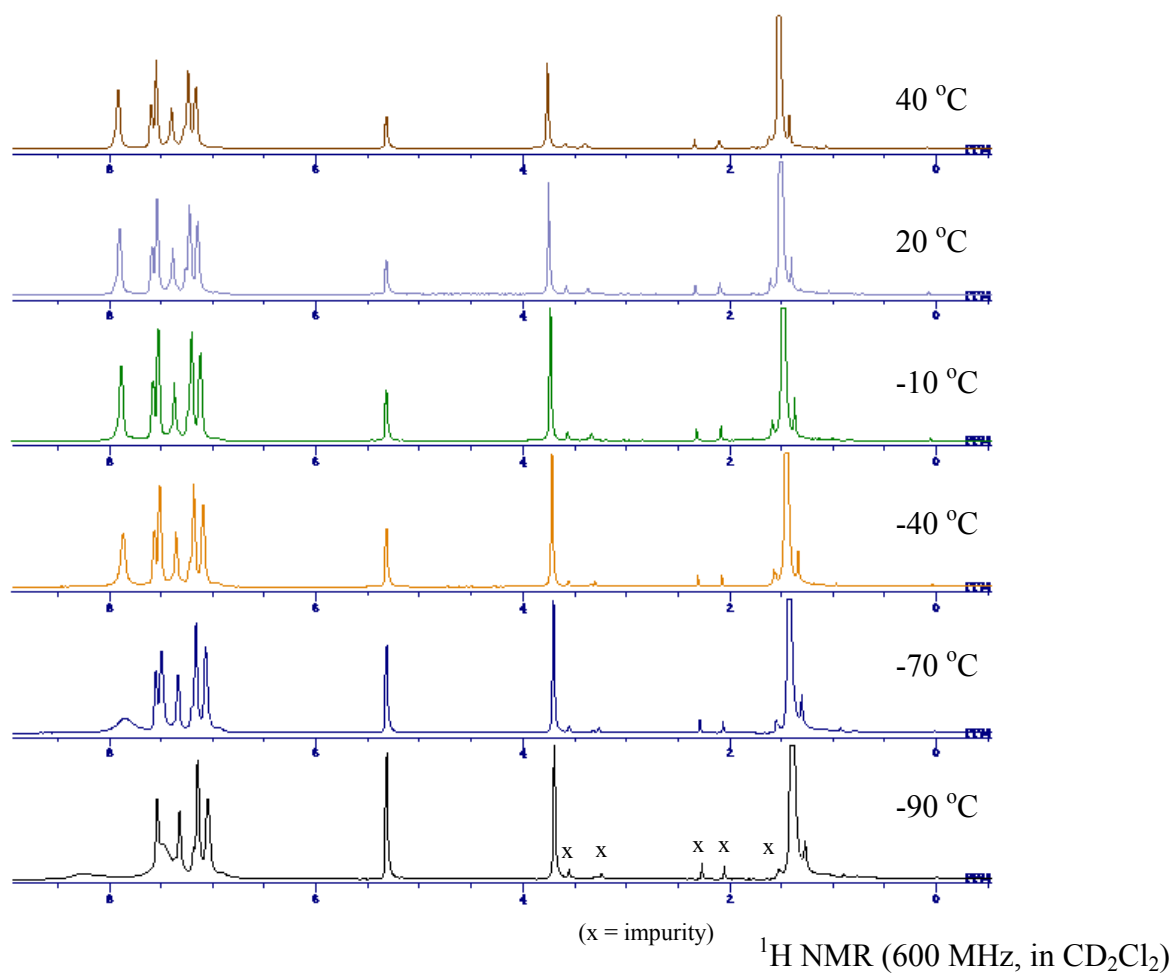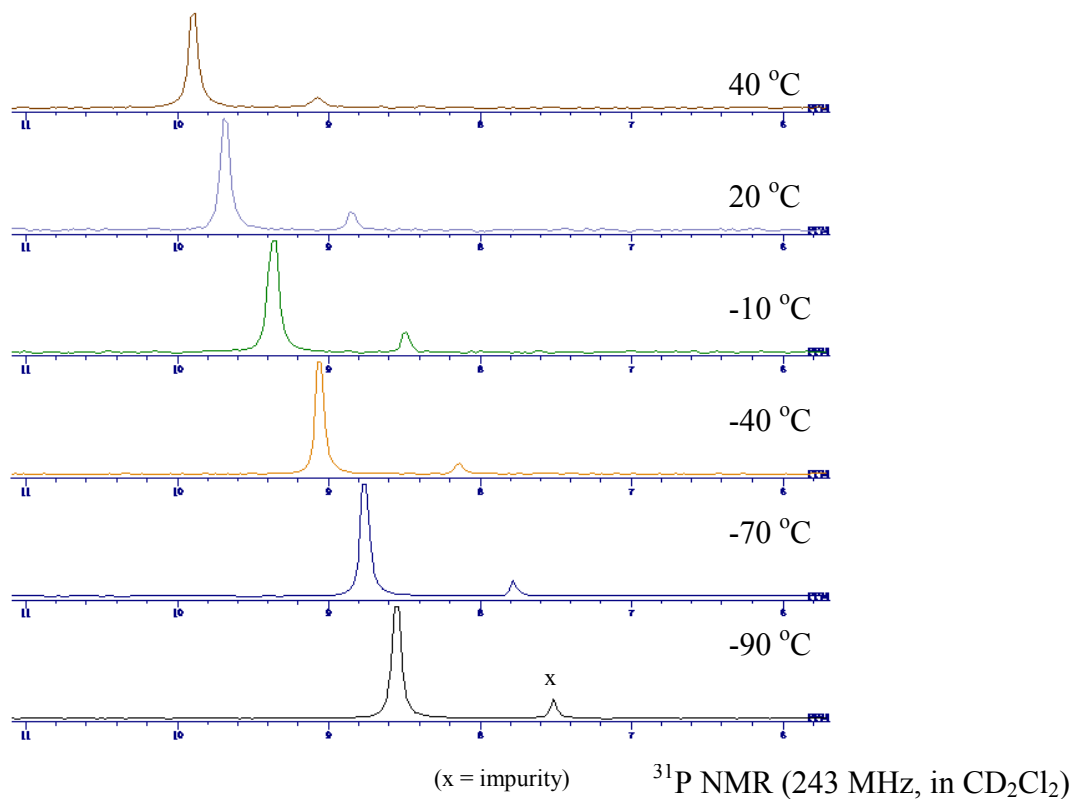



**Figure S6.** ESI-(tof)-MS spectrum of  $[(\eta^3\text{-methallyl})\text{Ni}(\text{Ph}_2\text{PN}^t\text{Bu})_2\text{TiCl}_2](\text{OTf})$  (**2a**)

Actual spectrum

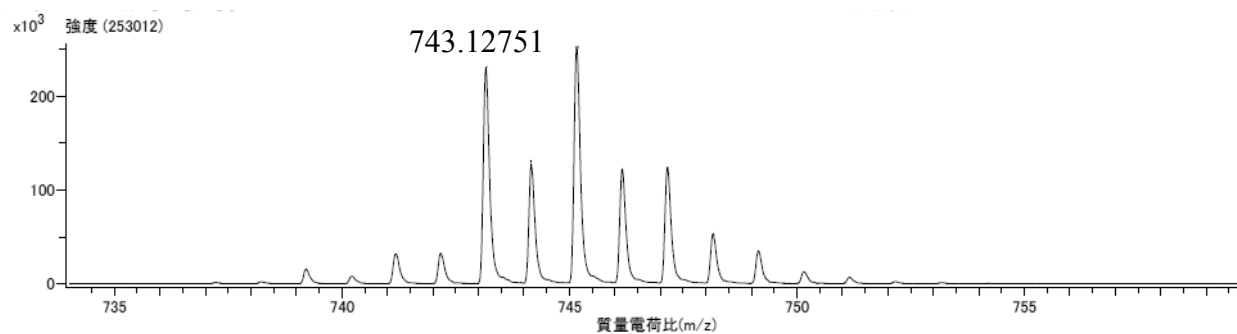

Simulated

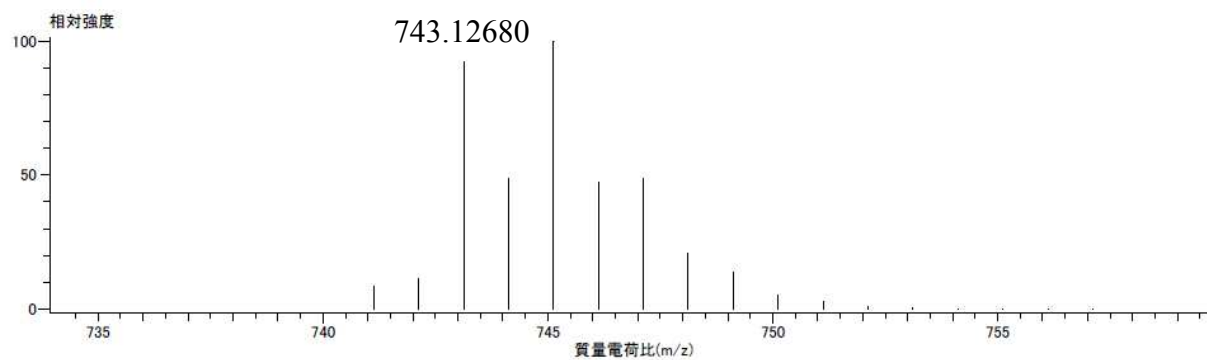

**Figure S7.** ESI-(tof)-MS spectrum of  $[(\eta^3\text{-methallyl})\text{Pd}(\text{Ph}_2\text{PN}^t\text{Bu})_2\text{TiCl}_2](\text{OTf})$  (**2b**)

Actual spectrum

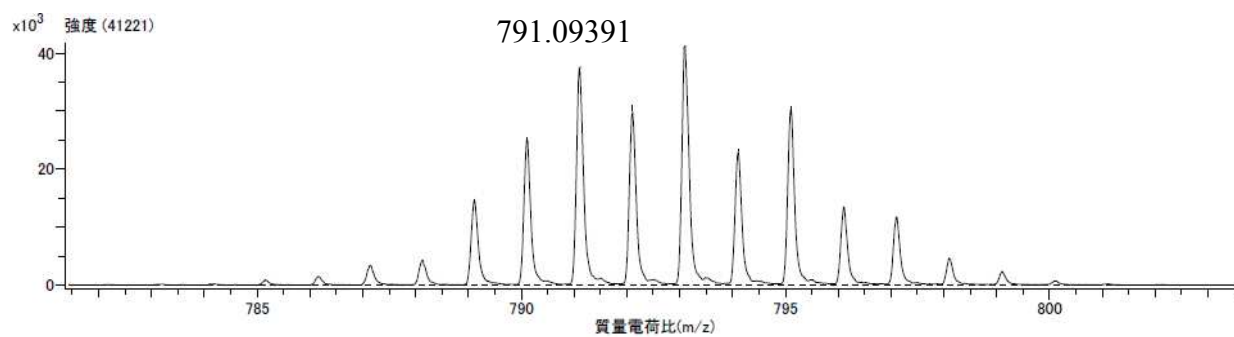

Simulated

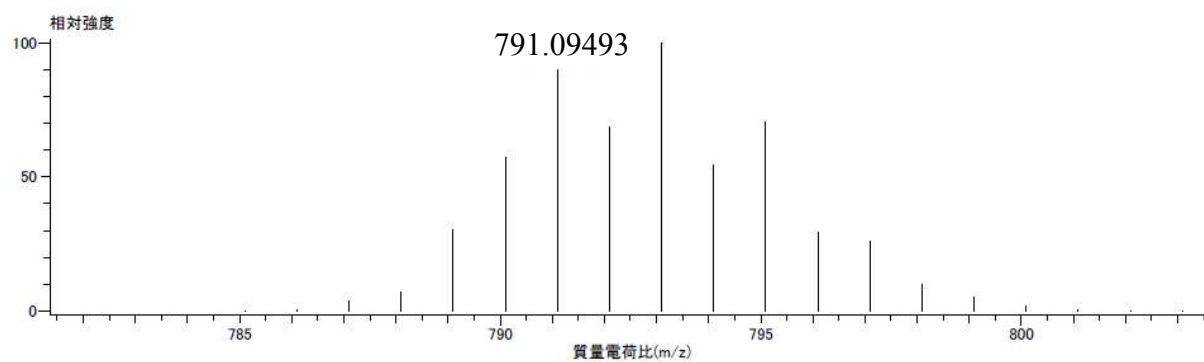

**Figure S8.** ESI-(tof)-MS spectrum of  $[(\eta^3\text{-methallyl})\text{Pt}(\text{Ph}_2\text{PN}^t\text{Bu})_2\text{TiCl}_2](\text{OTf})$  (**2c**)

Actual spectrum

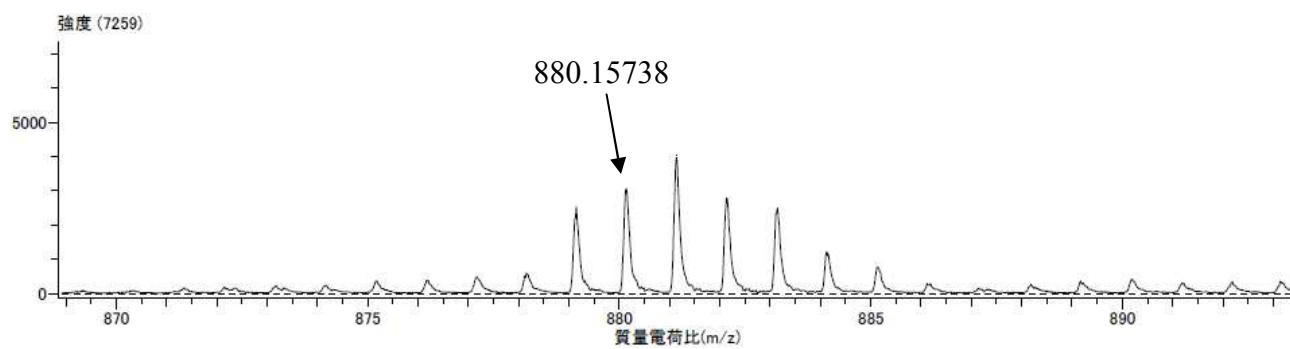

Simulated

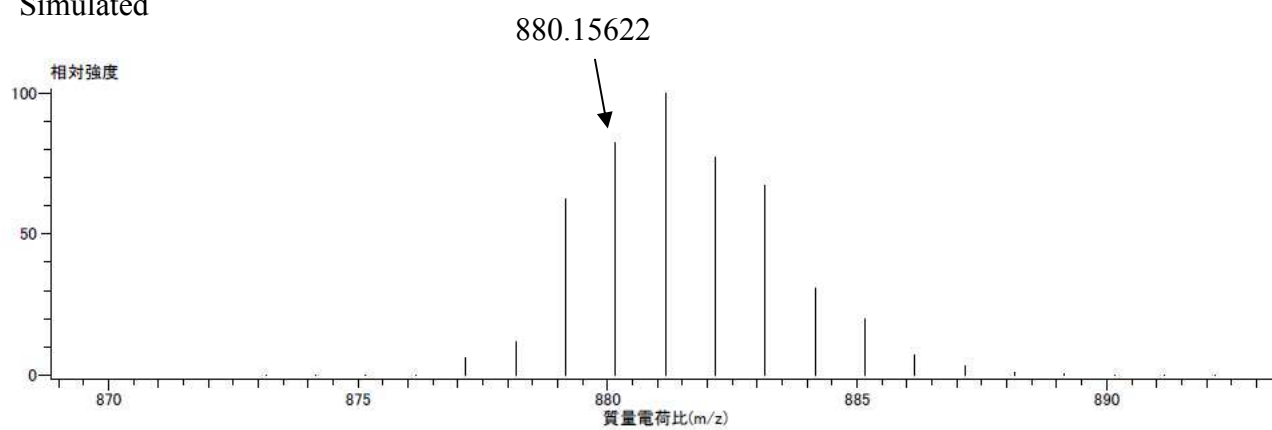

**Table S1.** Crystallographic data for **2a**, **2b**, and **2c**.

|                                                                 | <b>2a</b>                                                                                                                                             | <b>2b</b>                                                                                                                                                 | <b>2c</b>                                                                                                                                               |
|-----------------------------------------------------------------|-------------------------------------------------------------------------------------------------------------------------------------------------------|-----------------------------------------------------------------------------------------------------------------------------------------------------------|---------------------------------------------------------------------------------------------------------------------------------------------------------|
| Empirical Formula                                               | C <sub>37</sub> H <sub>45</sub> Cl <sub>2</sub> F <sub>3</sub> N <sub>2</sub> NiO <sub>3</sub> P <sub>2</sub><br>STi·1.5C <sub>7</sub> H <sub>8</sub> | C <sub>37</sub> H <sub>45</sub> Cl <sub>2</sub> F <sub>3</sub> N <sub>2</sub> O <sub>3</sub> P <sub>2</sub> Pd<br>STi·0.5 CH <sub>2</sub> Cl <sub>2</sub> | C <sub>37</sub> H <sub>45</sub> Cl <sub>2</sub> F <sub>3</sub> N <sub>2</sub> O <sub>3</sub> P <sub>2</sub> PtS<br>Ti·0.5 C <sub>7</sub> H <sub>8</sub> |
| Formula Weight                                                  | 1010.47                                                                                                                                               | 992.65                                                                                                                                                    | 1076.74                                                                                                                                                 |
| Crystal System                                                  | monoclinic                                                                                                                                            | monoclinic                                                                                                                                                | monoclinic                                                                                                                                              |
| Lattice Type                                                    | Primitive                                                                                                                                             | Primitive                                                                                                                                                 | Primitive                                                                                                                                               |
| Space Group                                                     | P2 <sub>1</sub> /c (#14)                                                                                                                              | P2 <sub>1</sub> /n (#14)                                                                                                                                  | P2 <sub>1</sub> /c (#14)                                                                                                                                |
| a, Å                                                            | 20.222(7)                                                                                                                                             | 11.1976(13)                                                                                                                                               | 19.813(3)                                                                                                                                               |
| b, Å                                                            | 15.556(5)                                                                                                                                             | 18.604(2)                                                                                                                                                 | 15.645(2)                                                                                                                                               |
| c, Å                                                            | 15.826(5)                                                                                                                                             | 21.654(2)                                                                                                                                                 | 15.723(2)                                                                                                                                               |
| α, deg.                                                         | 90                                                                                                                                                    | 90                                                                                                                                                        | 90                                                                                                                                                      |
| β, deg.                                                         | 102.066(6)                                                                                                                                            | 101.6701(17)                                                                                                                                              | 99.555(2)                                                                                                                                               |
| γ, deg.                                                         | 90                                                                                                                                                    | 90                                                                                                                                                        | 90                                                                                                                                                      |
| Volume, Å <sup>3</sup>                                          | 4869(3)                                                                                                                                               | 4417.6(8)                                                                                                                                                 | 4806.2(12)                                                                                                                                              |
| Z value                                                         | 4                                                                                                                                                     | 4                                                                                                                                                         | 4                                                                                                                                                       |
| D <sub>calc</sub> , g/cm <sup>3</sup>                           | 1.378                                                                                                                                                 | 1.492                                                                                                                                                     | 1.488                                                                                                                                                   |
| F(000)                                                          | 2102.00                                                                                                                                               | 1952.00                                                                                                                                                   | 2148.00                                                                                                                                                 |
| μ(MoKα), cm <sup>-1</sup>                                       | 8.207                                                                                                                                                 | 9.978                                                                                                                                                     | 33.302                                                                                                                                                  |
| Crystal Color, Habit                                            | Dark red, block                                                                                                                                       | Red, block                                                                                                                                                | red, platelet                                                                                                                                           |
| Crystal Dimensions, mm                                          | 0.18 x 0.16 x 0.05                                                                                                                                    | 0.25 x 0.20 x 0.10                                                                                                                                        | 0.10 x 0.05 x 0.03                                                                                                                                      |
| No. Observations (All reflections)                              | 8528                                                                                                                                                  | 9835                                                                                                                                                      | 10987                                                                                                                                                   |
| No. Variables                                                   | 601                                                                                                                                                   | 530                                                                                                                                                       | 521                                                                                                                                                     |
| Reflection/Parameter Ratio                                      | 14.19                                                                                                                                                 | 18.56                                                                                                                                                     | 21.09                                                                                                                                                   |
| R (All reflections)                                             | 0.1460                                                                                                                                                | 0.0617                                                                                                                                                    | 0.0652                                                                                                                                                  |
| R <sub>1</sub> (I>2.00σ(I)) <sup>a</sup>                        | 0.0961                                                                                                                                                | 0.0552                                                                                                                                                    | 0.0866                                                                                                                                                  |
| wR <sub>2</sub> (All reflections) <sup>b</sup>                  | 0.2857                                                                                                                                                | 0.1946                                                                                                                                                    | 0.2077                                                                                                                                                  |
| GOF                                                             | 1.000                                                                                                                                                 | 1.003                                                                                                                                                     | 1.002                                                                                                                                                   |
| Max Shift/Error in Final Cycle                                  | 0.000                                                                                                                                                 | 0.000                                                                                                                                                     | 0.000                                                                                                                                                   |
| Maximum peak in Final Diff. Map, e <sup>-</sup> /Å <sup>3</sup> | 3.46                                                                                                                                                  | 4.37                                                                                                                                                      | 5.92                                                                                                                                                    |
| Minimum peak in Final Diff. Map, e <sup>-</sup> /Å <sup>3</sup> | -0.95                                                                                                                                                 | -2.03                                                                                                                                                     | -3.11                                                                                                                                                   |

<sup>a)</sup>  $R_1 = \sum |F_o| - |F_c| / \sum |F_o|$  <sup>b)</sup>  $wR_2 = [\sum (w(F_o^2 - F_c^2)^2) / \sum (w(F_o^2)^2)]^{1/2}$

**Table S2.** Representative bond lengths and angles for **2a**, **2b**, and **2c**.

|                | <b>2a</b>         | <b>2b</b>  | <b>2c</b>  |
|----------------|-------------------|------------|------------|
|                | bond length (Å)   |            |            |
| M-Ti           | 2.6036(18)        | 2.8155(5)  | 2.7653(15) |
| M-Cl(1)        | 2.692(2)          | 3.0291(9)  | 3.124(2)   |
| M-C(1)         | 2.082(8)          | 2.222(3)   | 2.179(10)  |
| M-C(2)         | 2.093(9)          | 2.245(3)   | 2.247(10)  |
| M-C(3)         | 2.041(10)         | 2.171(3)   | 2.205(9)   |
| M-P(1)         | 2.240(2)          | 2.3244(9)  | 2.2889(17) |
| M-P(2)         | 2.237(2)          | 2.3061(9)  | 2.2903(17) |
| Ti-Cl(1)       | 2.313(2)          | 2.2958(11) | 2.286(2)   |
| Ti-Cl(2)       | 2.246(2)          | 2.2337(9)  | 2.229(3)   |
| Ti-N(1)        | 1.942(6)          | 1.939(3)   | 1.951(5)   |
| Ti-N(2)        | 1.945(5)          | 1.946(2)   | 1.957(5)   |
| Ti-P(1)        | 2.689(2)          | 2.7495(10) | 2.780(2)   |
| Ti-P(2)        | 2.699(2)          | 2.7534(10) | 2.764(2)   |
| N(1)-P(1)      | 1.656(7)          | 1.676(2)   | 1.658(6)   |
| N(2)-P(2)      | 1.657(7)          | 1.664(2)   | 1.635(6)   |
|                | bond angle (deg.) |            |            |
| P(1)-M-P(2)    | 111.33(8)         | 107.37(3)  | 108.17(6)  |
| C(1)-M-C(2)    | 39.4(3)           | 36.71(13)  | 36.1(4)    |
| C(1)-M-C(3)    | 70.1(3)           | 66.00(13)  | 65.5(3)    |
| C(2)-M-C(3)    | 40.0(3)           | 37.49(13)  | 36.9(3)    |
| P(1)-M-C(1)    | 88.9(2)           | 93.44(9)   | 93.1(2)    |
| P(1)-M-C(2)    | 111.6(2)          | 121.84(9)  | 121.8(2)   |
| P(1)-M-C(3)    | 156.5(2)          | 158.78(9)  | 158.1(2)   |
| P(2)-M-C(1)    | 156.1(2)          | 156.50(9)  | 156.5(2)   |
| P(2)-M-C(2)    | 117.0(2)          | 119.99(9)  | 120.6(2)   |
| P(2)-M-C(3)    | 87.3(2)           | 92.02(9)   | 92.3(2)    |
| N(1)-Ti-N(2)   | 116.4(2)          | 116.38(12) | 116.2(2)   |
| N(1)-Ti-Cl(1)  | 117.35(19)        | 114.56(9)  | 117.99(19) |
| N(1)-Ti-Cl(2)  | 102.8(2)          | 102.71(8)  | 102.5(2)   |
| N(2)-Ti-Cl(1)  | 117.5(2)          | 121.56(8)  | 119.29(19) |
| N(2)-Ti-Cl(2)  | 103.9(2)          | 100.78(8)  | 101.7(2)   |
| Cl(1)-Ti-Cl(2) | 93.05(9)          | 94.15(3)   | 91.53(11)  |

A 3D molecular model of the NiTi complex. The structure features a central metal core with a titanium (Ti) atom (blue sphere) and a nickel (Ni) atom (orange sphere). The surrounding ligands are represented by white spheres (hydrogen) and red/green spheres (oxygen/nitrogen). The electron density is visualized using green and red isosurfaces, with a label 'Ti' pointing to the blue sphere and 'Ni' pointing to the orange sphere.

**Figure S11.** ORTEP representation of the molecular structure of  $[(\eta^3\text{-methallyl})\text{Pd}(\text{Ph}_2\text{PN}^t\text{Bu})_2\text{TiCl}_2](\text{OTf})$  (**2b**) showing 50 % probability ellipsoids. Counter anion, solvent molecule ( $\text{CH}_2\text{Cl}_2$ ), and hydrogen atoms were omitted for clarity.

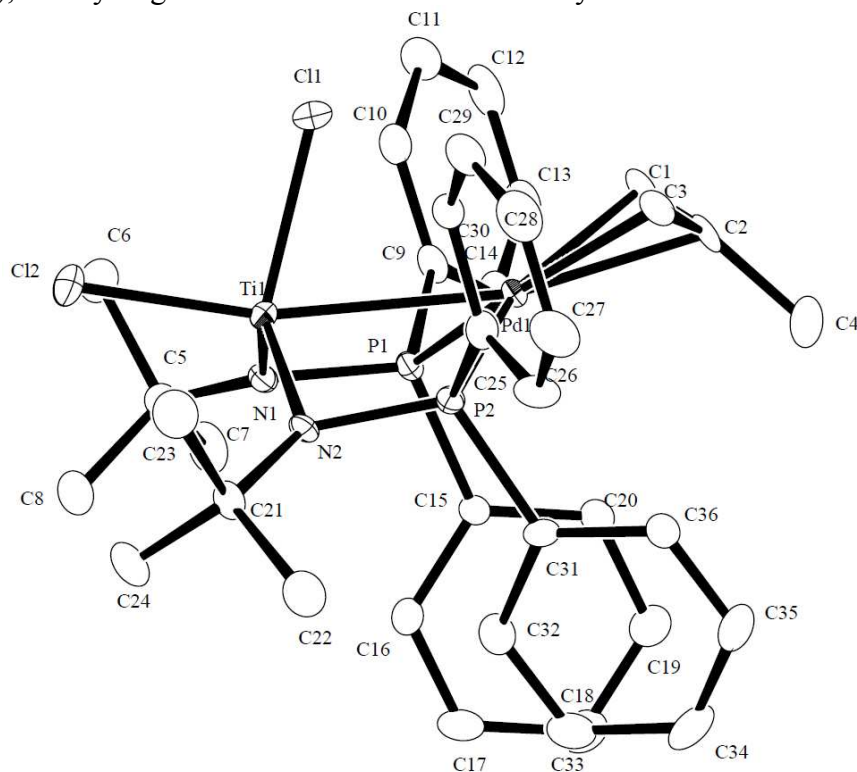

**Figure S12.** Gaussview depiction of HOMO-1 for the calculated complex  $[(\eta^3\text{-methallyl})\text{Pd}(\text{Ph}_2\text{PN}^t\text{Bu})_2\text{TiCl}_2](\text{OTf})$  (**2b**)

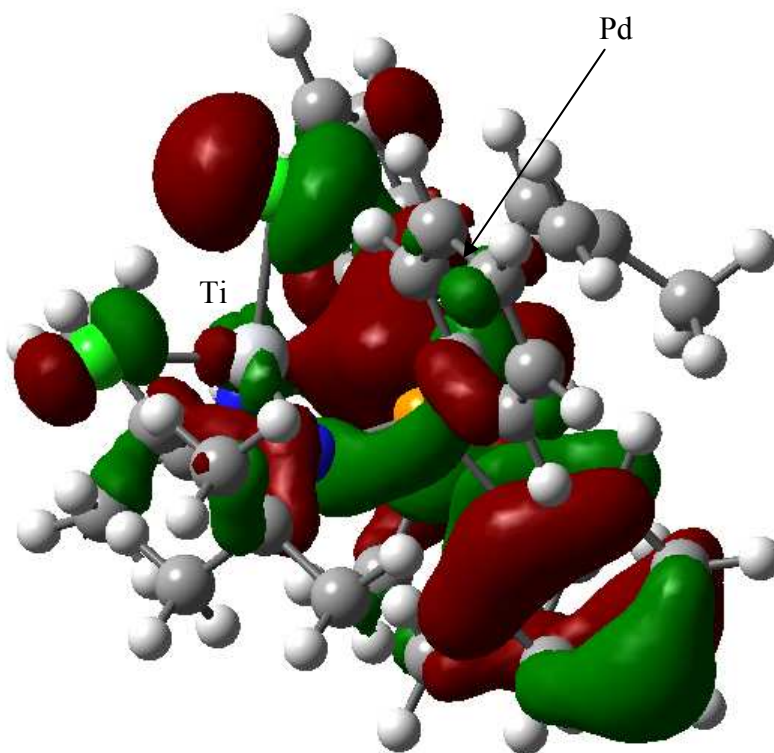

**Figure S13.** ORTEP representation of the molecular structure of  $[(\eta^3\text{-methallyl})\text{Pt}(\text{Ph}_2\text{PN}^t\text{Bu})_2\text{TiCl}_2](\text{OTf})$  (**2c**) showing 50 % probability ellipsoids. Hydrogen atoms were omitted for clarity. Counter anion, solvent molecule (toluene), and hydrogen atoms were omitted for clarity.

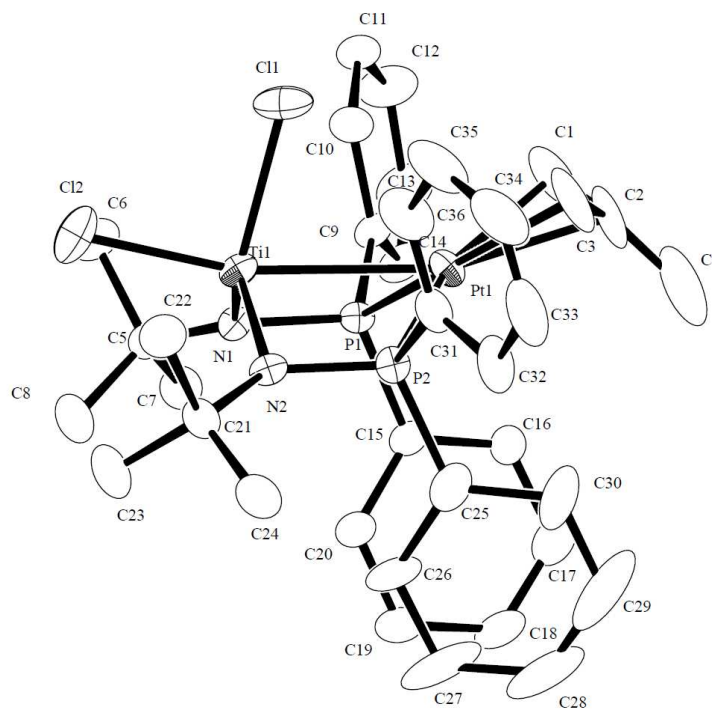

**Figure S14.** Gaussview depiction of HOMO for the calculated complex  $[(\eta^3\text{-methallyl})\text{Pt}(\text{Ph}_2\text{PN}^t\text{Bu})_2\text{TiCl}_2](\text{OTf})$  (**2c**)

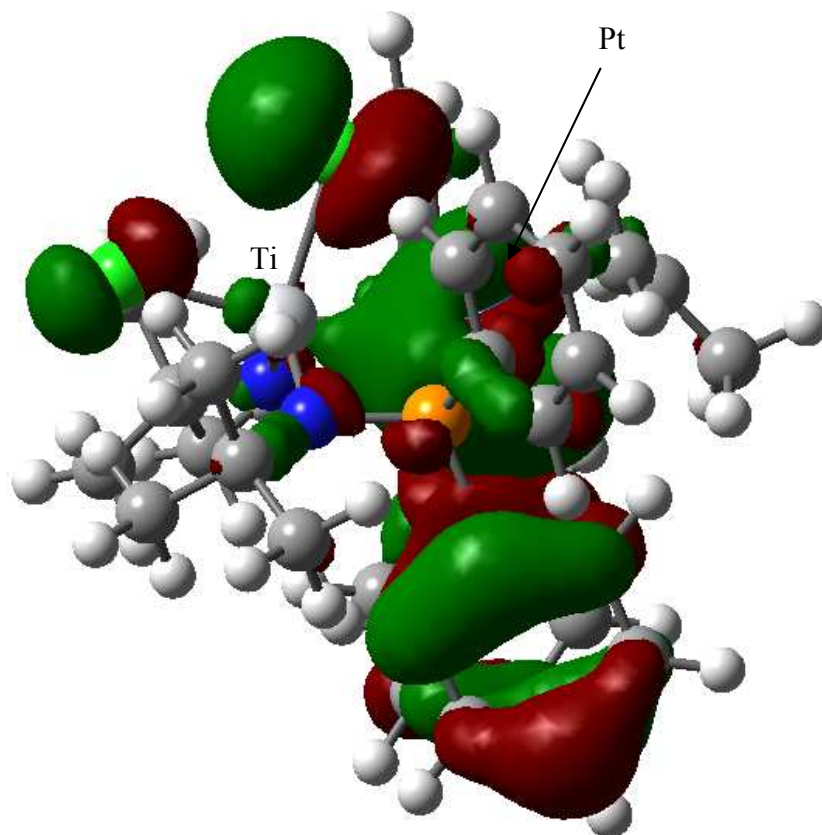

Supplement: Supplementary file 1 [file 4562674]
